# Supplementary material for: A 16-Year Study on Incidence and Progression of Diseased Sphenoethmoidal (Onodi) Cell
Source: Biomed Res Int. 2020 Jun 5;2020:2410415. doi: 10.1155/2020/2410415 (PMC7293742; doi:10.1155/2020/2410415)
Supplement: Supplementary Materials — Raw data of the subjects. [file 2410415.f1.csv]

op_date	age	exist_right_Onodi	exist_central_Onodi	exist_left_Onodi	at least one Onodi cell	diseased_right_Onodi	diseased_central_Onodi	diseased_left_Onodi	any abnormal Onodi	abnormal Onodi with follow-ups	affected_right_vision	affected_left_vision	earliest CT
20150127	64	0	0	0	0	0	0	0			0	0
20141007	63	1	0	1	1	0	0	0			0	0
20170206	63	1	0	1	1	0	0	0			0	0
20160704	75	1	0	1	1	0	0	0			0	0
20131231	44	0	0	1	1	0	0	0			0	0
20141007	63	0	0	1	1	0	0	0			0	0
20150302	67	1	0	1	1	1	0	1	1	1	0	0	2/6/2015
20140805	42	0	0	0	0	0	0	0			0	0
20170417	61	1	0	0	1	0	0	0			0	0
20140915	67	0	0	0	0	0	0	0			0	0
20141021	26	0	0	0	0	0	0	0			0	0
20040531	47	1	0	0	1	0	0	0			0	0
20031117	62	1	0	0	1	0	0	0			0	0
20150824	38	1	0	1	1	1	0	1	1				3/9/2015
20130320	36	1	0	1	1	1	0	1	1				11/19/2012
20110928	52	0	0	0	0	0	0	0			0	0
20040820	13	1	0	1	1	0	0	0			0	0
20031124	49	0	0	1	1	0	0	0			0	0
20170116	74	0	0	1	1	0	0	0			0	0
20040220	29	0	0	0	0	0	0	0			0	0
20110907	40	1	0	0	1	1	0	0	1	1	0	0
20130220	40	0	0	0	0	0	0	0			0	0
20120323	49	0	0	0	0	0	0	0			0	0
20050701	16	1	0	1	1	0	0	0			0	0
20150120	15	0	0	0	0	0	0	0			0	0
20140225	79	0	1	1	1	0	0	0			0	0
20030425	72	0	0	0	0	0	0	0			0	0
20041008	66	0	0	0	0	0	0	0			0	0
20121017	46	0	0	0	0	0	0	0			0	0
20140211	42	0	0	0	0	0	0	0			0	0
20120502	29	0	0	0	0	0	0	0			0	0
20130424	72	1	0	1	1	0	0	0			0	0
20021007	70	0	0	1	1	0	0	0			0	0
20030228	51	0	0	0	0	0	0	0			0	0
20121003	73	1	0	1	1	0	0	0			0	0
20060508	52	1	0	0	1	0	0	0			0	0
20111123	75	1	0	1	1	0	0	0			0	0
20060102	69	0	0	0	0	0	0	0			0	0
20031110	59	1	0	1	1	0	0	1	1	1	0	0	8/8/2011
20051212	21	0	0	0	0	0	0	0			0	0
20060728	32	1	0	1	1	1	0	1	1	1	0	0	7/10/2006
20060626	56	1	0	1	1	0	0	0			0	0
20111019	70	1	0	1	1	0	0	0			0	0
20011221	63	1	0	1	1	0	0	1	1				10/5/2007
20130306	58	1	0	1	1	1	0	1	1	1	0	0	2/4/2013
20120725	55	1	0	1	1	1	0	1	1	1	0	0	6/15/2012
20050225	76	0	0	1	1	0	0	1	1				12/29/2004
20060731	65	1	0	1	1	0	0	0			0	0
20050808	54	1	0	1	1	0	0	0			0	0
20040604	51	0	0	0	0	0	0	0			0	0
20121024	42	1	0	1	1	0	0	0			0	0
20130403	42	0	0	0	0	0	0	0			0	0
20020531	32	0	0	1	1	0	0	0			0	0
20050506	48	1	0	1	1	0	0	0			0	0
20011012	65	1	0	0	1	0	0	0			0	0
20041105	42	0	0	0	0	0	0	0			0	0
20111026	50	0	0	0	0	0	0	0			0	0
20040726	64	0	0	1	1	0	0	1	1	1	0	0	7/14/2004
20130626	54	0	0	1	1	0	0	0			0	0
20140624	64	0	0	0	0	0	0	0			0	0
20050117	56	0	0	1	1	0	0	0			0	0
20040827	46	0	0	1	1	0	0	1	1	1	0	0	8/13/2004
20130227	49	0	0	1	1	0	0	0			0	0
20121205	51	0	0	0	0	0	0	0			0	0
20050610	50	1	0	1	1	1	0	1	1				11/14/2003
20041224	55	1	0	1	1	0	0	0			0	0
20050124	49	1	0	1	1	0	0	1	1				1/11/2005
20120516	73	0	0	0	0	0	0	0			0	0
20120606	51	1	0	1	1	0	0	0			0	0
20011130	43	0	0	0	0	0	0	0			0	0
20161017	71	0	0	0	0	0	0	0			0	0
20141104	60	0	0	0	0	0	0	0			0	0
20160627	35	0	0	0	0	0	0	0			0	0
20120608	59	0	0	0	0	0	0	0			0	0
20050214	36	0	0	0	0	0	0	0			0	0
20030808	13	0	0	0	0	0	0	0			0	0
20040816	50	0	0	1	1	0	0	0			0	0
20060410	55	0	0	0	0	0	0	0			0	0
20060515	46	0	0	0	0	0	0	0			0	0
20050624	42	0	0	0	0	0	0	0			0	0
20040709	36	1	0	1	1	0	0	0			0	0
20041122	56	1	0	1	1	0	0	0			0	0
20121128	69	0	0	0	0	0	0	0			0	0
20020729	31	0	0	0	0	0	0	0			0	0
20060717	49	1	0	1	1	1	0	1			0	0
20050704	41	0	0	0	0	0	0	0			0	0
20140407	75	1	0	0	1	1	0	0	1				12/13/2013
20131030	73	0	0	0	0	0	0	0			0	0
20140902	23	0	0	0	0	0	0	0			0	0
20141216	38	1	0	0	1	0	0	0			0	0
20150310	41	0	0	0	0	0	0	0			0	0
20160118	37	1	0	1	1	0	0	0			0	0
20040326		1	0	1	1	0	0	0			0	0
20060702	31	0	0	0	0	0	0	0			0	0
20050321	30	0	0	0	0	0	0	0			0	0
20020225	24	0	0	0	0	0	0	0			0	0
20050307	27	1	0	1	1	0	0	0			0	0
20020722	13	0	0	0	0	0	0	0			0	0
20060522	51	0	0	0	0	0	0	0			0	0
20050321	44	0	0	0	0	0	0	0			0	0
20030207	23	1	0	1	1	0	0	0			0	0
20030728	55	0	0	0	0	0	0	0			0	0
20060320	28	0	0	0	0	0	0	0			0	0
20130410	43	0	0	0	0	0	0	0			0	0
20040712	19	1	0	1	1	1	0	1			0	0
20040719	54	1	0	1	1	0	0	0			0	0
20041015	25	0	0	0	0	0	0	0			0	0
20040920	40	0	0	0	0	0	0	0			0	0
20050411	65	0	0	1	1	0	0	0			0	0
20050128	40	0	0	1	1	0	0	0			0	0
20050704	47	0	0	0	0	0	0	0			0	0
20111221	44	0	0	1	1	0	0	0			0	0
20050729	45	1	0	1	1	0	0	0			0	0
20050909	49	0	0	0	0	0	0	0			0	0
20130102	53	0	0	0	0	0	0	0			0	0
20050808	22	0	0	0	0	0	0	0			0	0
20060609	44	0	0	0	0	0	0	0			0	0
20060623	37	1	0	1	1	0	0	0			0	0
20060714	59	0	0	0	0	0	0	0			0	0
20121212	69	0	0	0	0	0	0	0			0	0
20120229	35	1	0	0	1	0	0	0			0	0
20120815	15	0	0	0	0	0	0	0			0	0
20120309	67	1	0	0	1	0	0	0			0	0
20111221	40	1	0	1	1	0	0	1	1	1	0	0	11/4/2011
20120919	33	0	0	0	0	0	0	0			0	0
20121031	39	0	0	0	0	0	0	0			0	0
20111123	30	0	0	0	0	0	0	0			0	0
20120502	40	0	0	0	0	0	0	0			0	0
20120815	50	0	0	0	0	0	0	0			0	0
20130123	33	0	1	0	1	0	0	0			0	0
20120912	62	0	0	0	0	0	0	0			0	0
20130313	38	0	0	0	0	0	0	0			0	0
20160523	55	1	0	1	1	1	0	1	1	1	0	0	5/21/2016
20160523	37	0	0	1	1	0	0	1			0	0
20161219	47	0	0	1	1	0	0	0			0	0
20140401	82	1	0	1	1	0	0	0			0	0
20170410	65	0	0	0	0	0	0	0			0	0
20140916	14	1	0	0	1	0	0	0			0	0
20141014	38	0	0	0	0	0	0	0			0	0
20160215	57	0	0	0	0	0	0	0			0	0
20150316	76	0	0	0	0	0	0	0			0	0
20140609	51	0	0	0	0	0	0	0			0	0
20150420	63	1	0	1	1	0	0	0			0	0
20160704	76	0	0	1	1	0	0	0			0	0
20151109	66	1	0	0	1	0	0	0			0	0
20140506	63	0	0	0	0	0	0	0			0	0
20130925	61	1	0	1	1	1	0	1	1	1	0	0	8/29/2013
20141202	62	0	0	0	0	0	0	0			0	0
20150609	61	0	0	0	0	0	0	0			0	0
20170619	48	0	0	0	0	0	0	0			0	0
20151123	43	1	0	1	1	1	0	1	1	1	0	0	2/14/2015
20160524	57	1	0	1	2	0	0	1	1	1	0	0	4/16/2016
20160822	70	0	0	0	0	0	0	0			0	0
20151005	81	1	0	0	1	0	0	0			0	0
20050823	48	1	0	1	1	1	0	1	1	1	1	0	8/5/2005
20170619	65	1	0	1	1	0	0	0			0	0
20150407	68	1	0	1	1	1	0	0	1	1	0	0	3/11/2015
20160411	53	0	0	0	0	0	0	0			0	0
20160118	15	0	0	0	0	0	0	0			0	0
20140610	49	0	0	0	0	0	0	0			0	0
20140721	30	1	0	1	1	0	0	0			0	0
20170313	56	0	0	1	1	0	0	0			0	0
20140805	53	0	0	1	1	0	0	0			0	0
20170306	60	0	0	0	0	0	0	0			0	0
20140211	78	1	0	0	1	0	0	0			0	0
20170320	92	0	0	0	0	0	0	0			0	0
20170116	49	1	0	1	1	0	0	0			0	0
20170320	73	0	0	0	0	0	0	0			0	0
20150914	76	1	0	1	1	1	0	1	1				8/17/2015
20170627	58	1	0	0	1	1	0	0	1	1	0	0	6/25/2017
20160704	59	0	0	0	0	0	0	0			0	0
20150421	35	0	0	0	0	0	0	0			0	0
20150622	77	0	0	0	0	0	0	0			0	0
20140728	35	0	0	1	1	0	0	0	1				2/17/2006
20150323	55	1	0	1	1	0	0	0			0	0
20170306	61	1	0	0	1	0	0	0			0	0
20170110	46	0	0	0	0	0	0	0			0	0
20160627	83	1	0	1	1	0	0	0			0	0
20140401	77	1	0	0	1	0	0	0			0	0
20140617	85	0	0	0	0	0	0	0			0	0
20150420	71	1	0	0	1	0	0	0			0	0
20080204	72	1	0	1	1	0	0	0			0	0
20140812	47	0	0	0	0	0	0	0			0	0
20150713	51	0	0	1	1	0	0	0			0	0
20150414	69	0	0	0	0	0	0	0			0	0
20131224	72	1	0	0	1	0	0	0			0	0
20160201	38	1	0	0	1	1	0	0	1	1	0	0	1/26/2016
20140915	69	0	0	0	0	0	0	0			0	0
20160620	30	0	0	0	0	0	0	0			0	0
20140429	50	1	0	0	1	1	0	0	1				4/14/2014
20150714	75	0	0	0	0	0	0	0			0	0
20151012	50	0	0	0	0	0	0	0			0	0
20131203	52	0	0	0	0	0	0	0			0	0
20151026	49	0	0	0	0	0	0	0			0	0
20160606	56	1	0	1	1	1	0	1	1	1	0	0	9/24/2013
20140317	27	1	0	1	1	0	0	0			0	0
20140826	52	0	0	0	0	0	0	0			0	0
20151123	65	1	0	0	1	1	0	0	1	1	0	0	11/17/2015
20140225	75	0	0	0	0	0	0	0			0	0
20140923	41	0	0	0	0	0	0	0			0	0
20161226	53	0	0	1	1	0	0	1	1	1	0	0
20140407	61	1	0	1	1	0	0	1	1	1	0	0	4/1/2014
20140414	51	1	0	0	1	0	0	0			0	0
20140826	51	1	0	1	1	0	0	0			0	0
20140901	42	0	0	0	0	0	0	0			0	0
20150608	32	1	0	0	1	0	0	0			0	0
20150720	61	0	0	0	0	0	0	0			0	0
20151019	27	0	0	0	0	0	0	0			0	0
20151026	55	0	0	0	0	0	0	0			0	0
20160425	48	1	0	0	1	0	0	0			0	0
20160718	32	0	0	1	1	0	0	0			0	0
20161121	58	1	0	1	1	0	0	0			0	0
20170612	35	1	0	1	1	0	0	0			0	0
20151207	68	1	0	1	1	1	0	0	1	1	0	0	11/9/2015
20151116	72	0	0	0	0	0	0	0			0	0
20150526	23	0	0	0	0	0	0	0			0	0
total		85	2	86	113	23	0	26	32	22	1	0
